# Supplementary material for: Phenothiazine-based bipolar green-emitters containing benzimidazole units: synthesis, photophysical and electroluminescence properties
Source: Royal Society of Chemistry journal article supplement (doi:10.1039/c5ra18372c), 2015-01-01
Supplement: c5ra18372c1.pdf [file c5ra18372c1.pdf]

# Phenothiazine-Based Bipolar Green-Emitters Containing Benzimidazole Units: Synthesis, Photophysical and Electroluminescent Properties

Govardhana Babu Bodedla,<sup>a</sup> K. R. Justin Thomas,<sup>\*,a</sup> Sandeep Kumar,<sup>a</sup> Jwo-Huei Jou<sup>b</sup> and Chieh-Ju Li<sup>b</sup>

<sup>a</sup> Organic Materials Chemistry, Department of Chemistry, Indian Institute of Technology Roorkee, Roorkee – 247 667, India.

<sup>b</sup> Department of Material Science and Engineering, National Tsing Hua University, Hsinchu 30013, Taiwan.

## Supporting Information

|    |                                                                                                                               |     |
|----|-------------------------------------------------------------------------------------------------------------------------------|-----|
| 1  | <b>Fig. S1</b> Absorption spectra of <b>4a</b> recorded in different solvents.                                                | S2  |
| 2  | <b>Fig. S2</b> Absorption spectra of <b>4b</b> recorded in different solvents.                                                | S2  |
| 3  | <b>Fig. S3</b> Absorption spectra of <b>4c</b> recorded in different solvents.                                                | S3  |
| 4  | <b>Fig. S4</b> Absorption spectra of <b>4d</b> recorded in different solvents.                                                | S3  |
| 5  | <b>Fig. S5</b> Absorption spectra of the dyes recorded on thin film.                                                          | S4  |
| 6  | <b>Fig. S6</b> Emission spectra of <b>4a</b> recorded in different solvents.                                                  | S4  |
| 7  | <b>Fig. S7</b> Emission spectra of <b>4c</b> recorded in different solvents.                                                  | S5  |
| 8  | <b>Fig. S8</b> Emission spectra of <b>4d</b> recorded in different solvents.                                                  | S5  |
| 9  | <b>Fig. S9</b> Emission spectra of the dyes recorded on thin film.                                                            | S6  |
| 10 | <b>Table S1</b> Absorption data for the dyes ( <b>4a-4d</b> ) recorded in different solvents with increasing solvent polarity | S6  |
| 11 | <b>Fig. S10</b> Differential pulse voltammograms for the dyes ( <b>4a-4d</b> ) recorded in dichloromethane.                   | S7  |
| 12 | <b>Fig. S11</b> <sup>1</sup> H NMR spectrum of <b>4a</b> recorded in CDCl <sub>3</sub> .                                      | S8  |
| 13 | <b>Fig. S12</b> <sup>1</sup> H NMR (expanded) spectrum of <b>4a</b> recorded in CDCl <sub>3</sub> .                           | S9  |
| 14 | <b>Fig. S13</b> <sup>13</sup> C NMR spectrum of <b>4a</b> recorded in CDCl <sub>3</sub> .                                     | S10 |
| 15 | <b>Fig. S14</b> <sup>1</sup> H NMR spectrum of <b>4b</b> recorded in CDCl <sub>3</sub> .                                      | S11 |
| 16 | <b>Fig. S15</b> <sup>1</sup> H NMR (expanded) spectrum of <b>4b</b> recorded in CDCl <sub>3</sub> .                           | S12 |
| 17 | <b>Fig. S16</b> <sup>13</sup> C NMR spectrum of <b>4b</b> recorded in CDCl <sub>3</sub> .                                     | S13 |
| 18 | <b>Fig. S17</b> <sup>1</sup> H NMR spectrum of <b>4c</b> recorded in CDCl <sub>3</sub> .                                      | S14 |
| 19 | <b>Fig. S18</b> <sup>1</sup> H NMR (expanded) spectrum of <b>4c</b> recorded in CDCl <sub>3</sub> .                           | S15 |
| 20 | <b>Fig. S19</b> <sup>13</sup> C NMR spectrum of <b>4c</b> recorded in CDCl <sub>3</sub> .                                     | S16 |

21. Fig. S20  $^1\text{H}$  NMR spectrum of **4d** recorded in  $\text{CDCl}_3$ . S17  
22. Fig. S21  $^1\text{H}$  NMR (expanded) spectrum of **4d** recorded in  $\text{CDCl}_3$ . S18  
23. Fig. S22  $^{13}\text{C}$  NMR spectrum of **4d** recorded in  $\text{CDCl}_3$ . S19

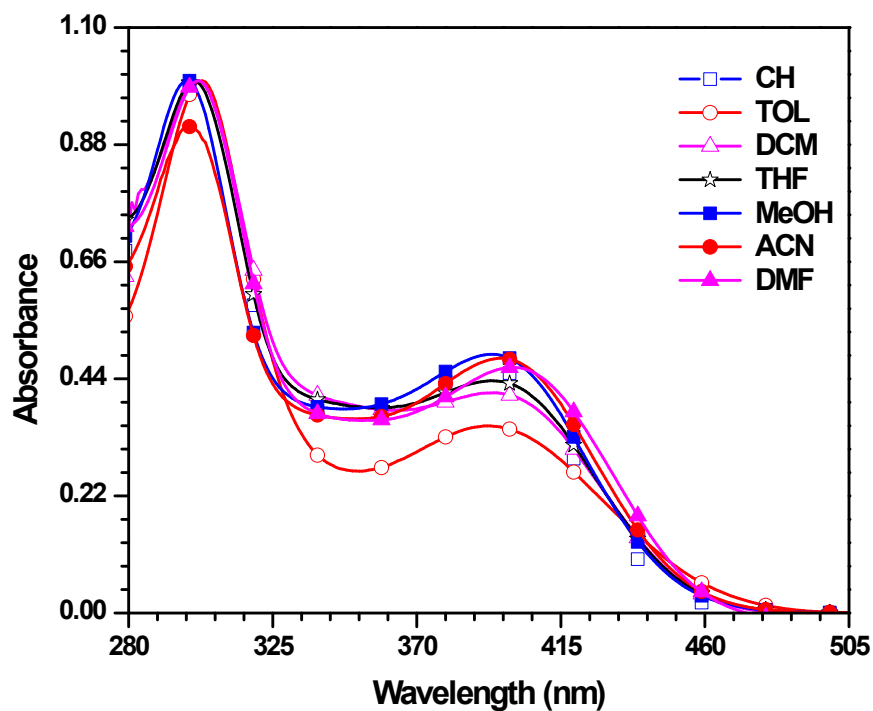

Fig. S1 Absorption spectra of **4a** recorded in different solvents.

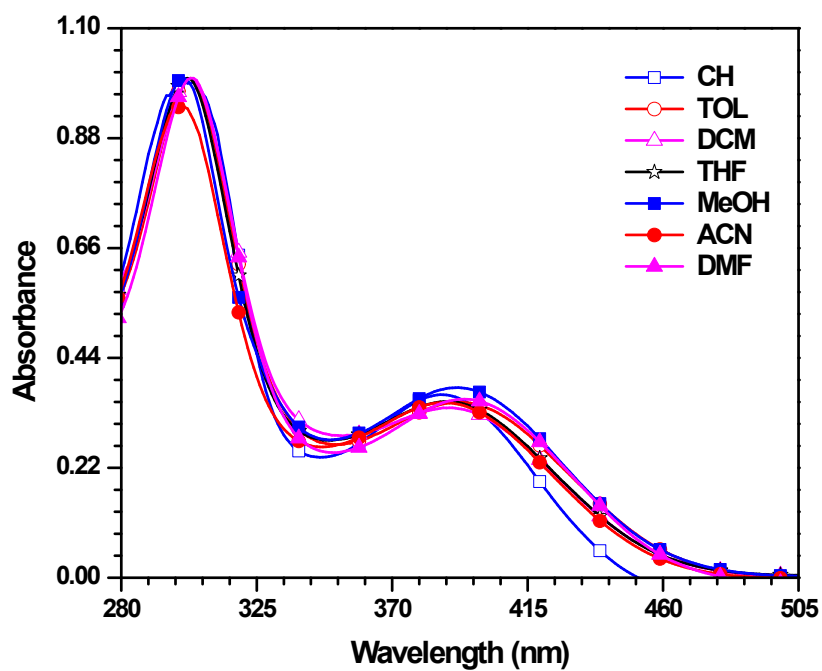

Fig. S2 Absorption spectra of **4b** recorded in different solvents.

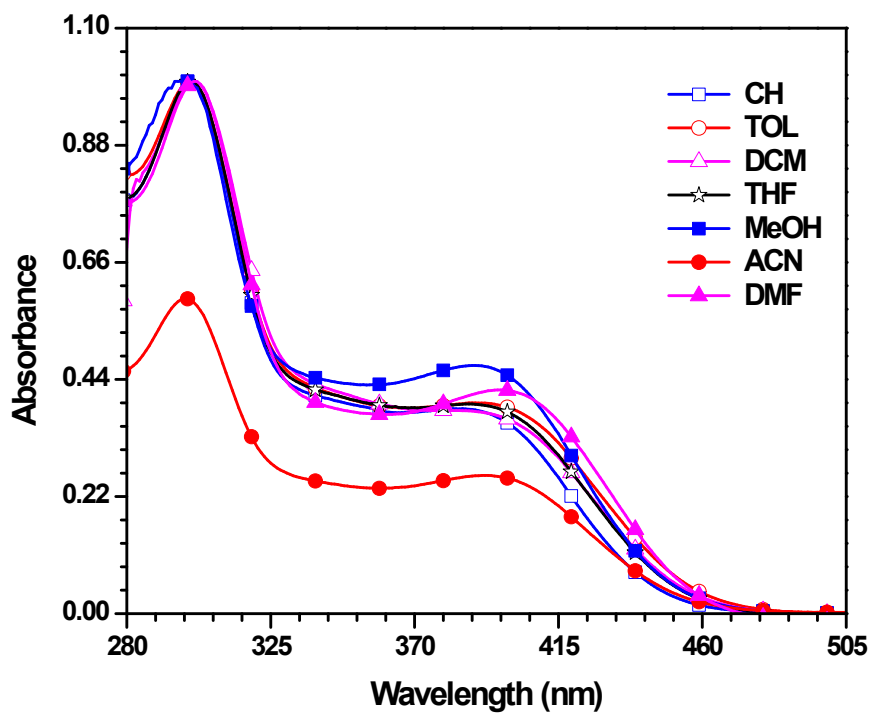

Fig. S3 Absorption spectra of 4c recorded in different solvents.

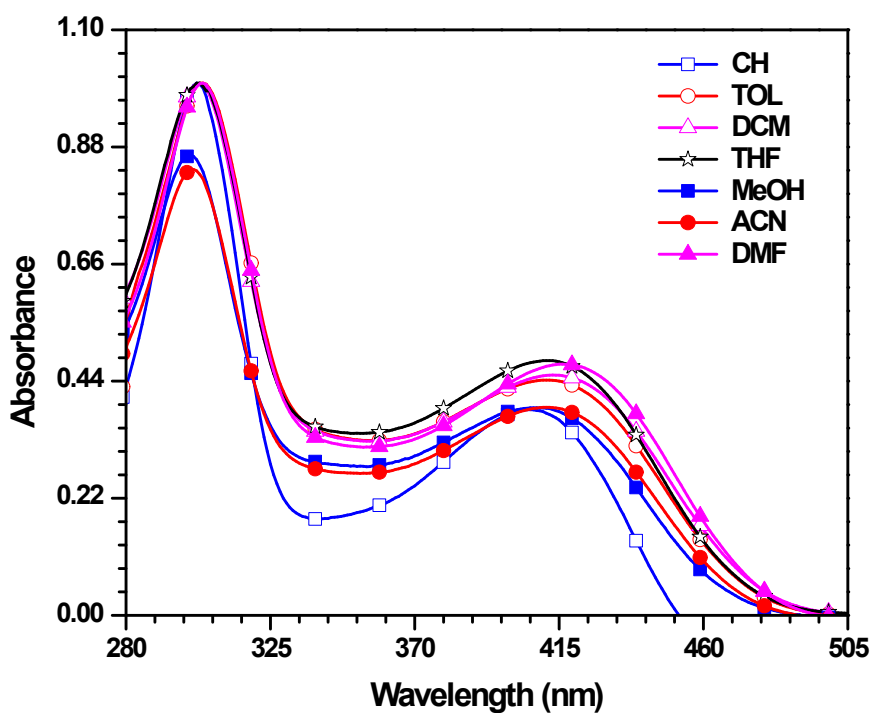

Fig. S4 Absorption spectra of 4d recorded in different solvents.

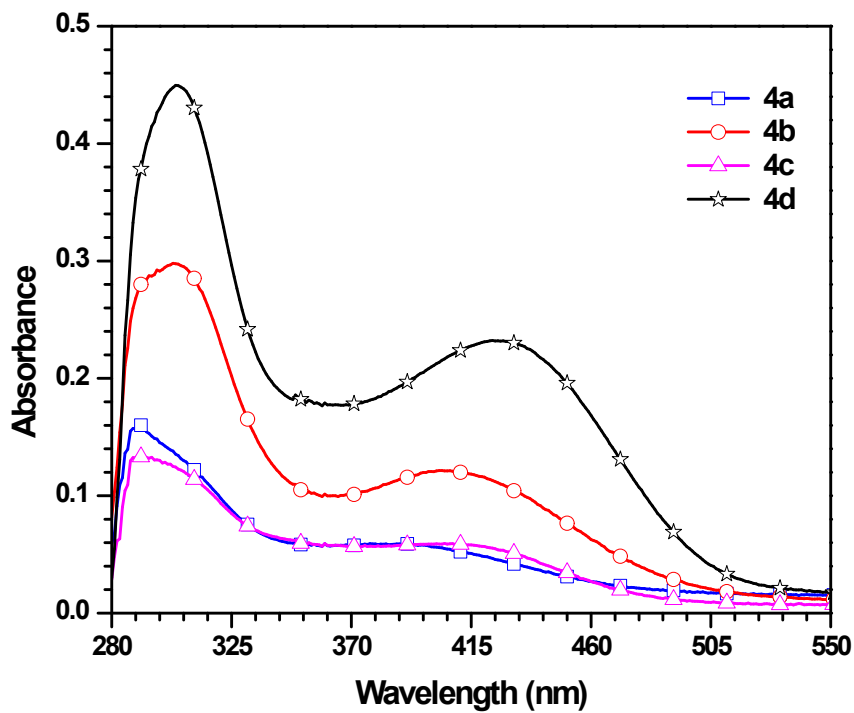

Fig. S5 Absorption spectra of the dyes recorded as thin film.

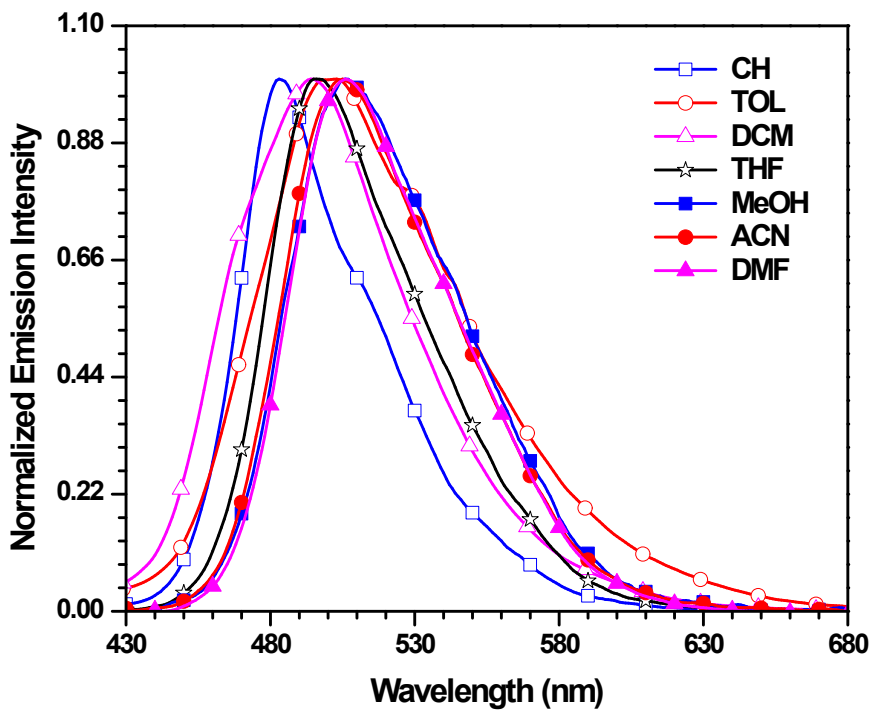

Fig. S6 Emission spectra of 4a recorded in different solvents.

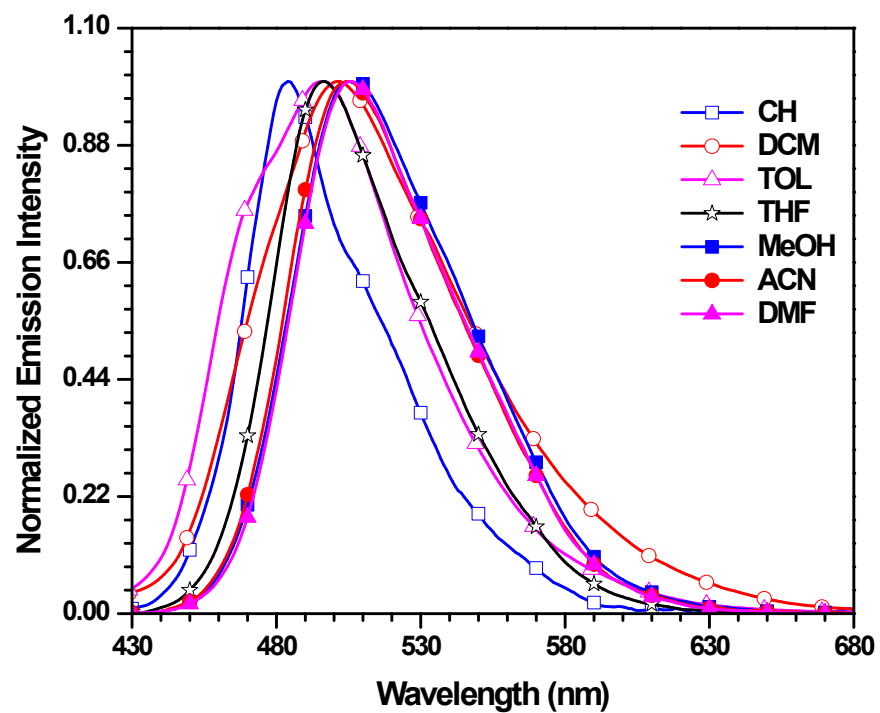

Fig. S7 Emission spectra of **4c** recorded in different solvents.

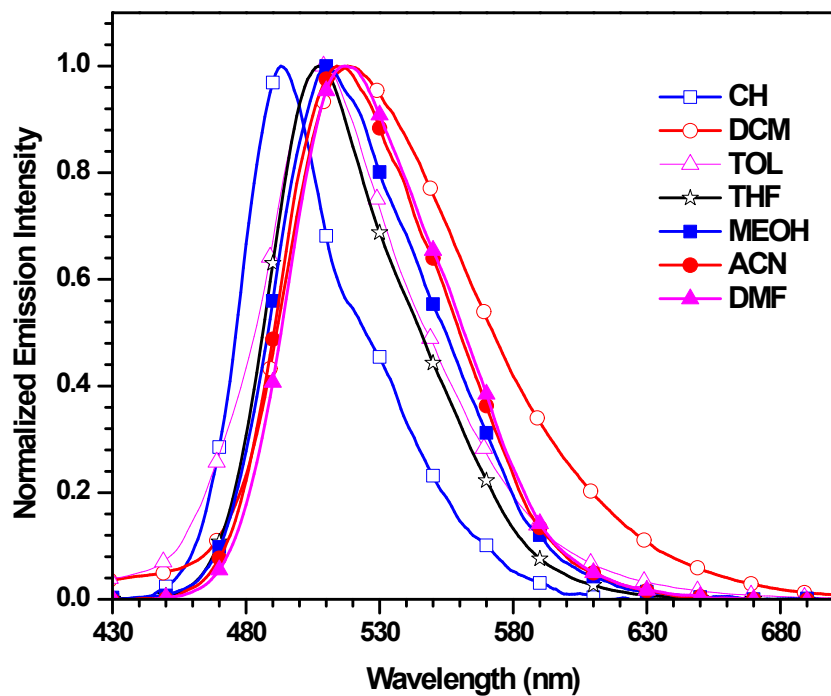

Fig. S8 Emission spectra of **4d** recorded in different solvents.

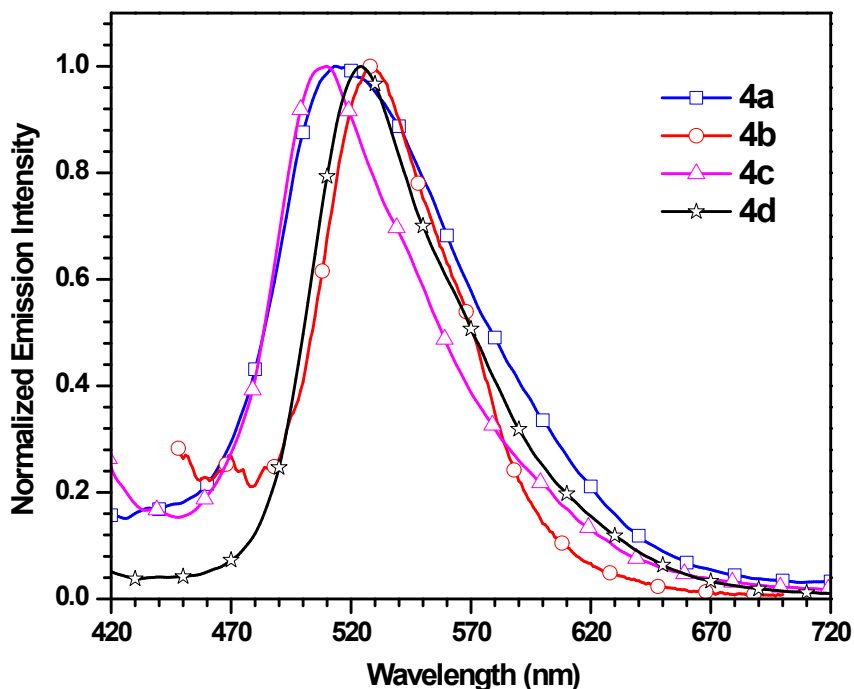

Fig. S9 Emission spectra of the dyes recorded as thin film.

Table S1 Absorption data for the dyes (4a-4d) recorded in different solvents with increasing solvent polarity

| Dye       | $\lambda_{\text{abs}}$ , nm ( $\epsilon_{\text{max}} \times 10^3 \text{ M}^{-1} \text{ cm}^{-1}$ ) |                            |                            |                            |             |              |                           |                   |
|-----------|----------------------------------------------------------------------------------------------------|----------------------------|----------------------------|----------------------------|-------------|--------------|---------------------------|-------------------|
|           | CH                                                                                                 | TOL                        | DCM                        | THF                        | MeOH        | ACN          | DMF                       | Film <sup>a</sup> |
| <b>4a</b> | 375,<br>300                                                                                        | 377 (27.5),<br>303 (80.8), | 377 (28.4),<br>300(61.0)   | 375 (31.6),<br>302 (93.5)  | 374,<br>299 | 375,<br>300  | 378 (31.6),<br>302 (90.9) | 409, 290          |
| <b>4b</b> | 386,<br>301                                                                                        | 389 (19.0),<br>303 (56.0)  | 392 (28.9),<br>303 (82.3)  | 388 (22.9),<br>302 (65.0)  | 392,<br>300 | 387,<br>300  | 394 (30.0),<br>304 (58.7) | 403, 303          |
| <b>4c</b> | 385 ,<br>299                                                                                       | 382 (26.7),<br>301 (69.9), | 389 (29.9),<br>300 (75.5)  | 388 (23.2),<br>300 (58.9)  | 388,<br>299 | 392,<br>298, | 397 (23.2),<br>301 (55.2) | 405, 290          |
| <b>4d</b> | 406<br>302                                                                                         | 412 (48.3),<br>305 (108.0) | 414 (57.7),<br>303 (126.0) | 412 (59.8),<br>303 (128.0) | 407,<br>300 | 411,<br>301  | 417 (47.3),<br>303 (97.7) | 423, 304          |

<sup>a</sup> Measured for spin cast thin film.

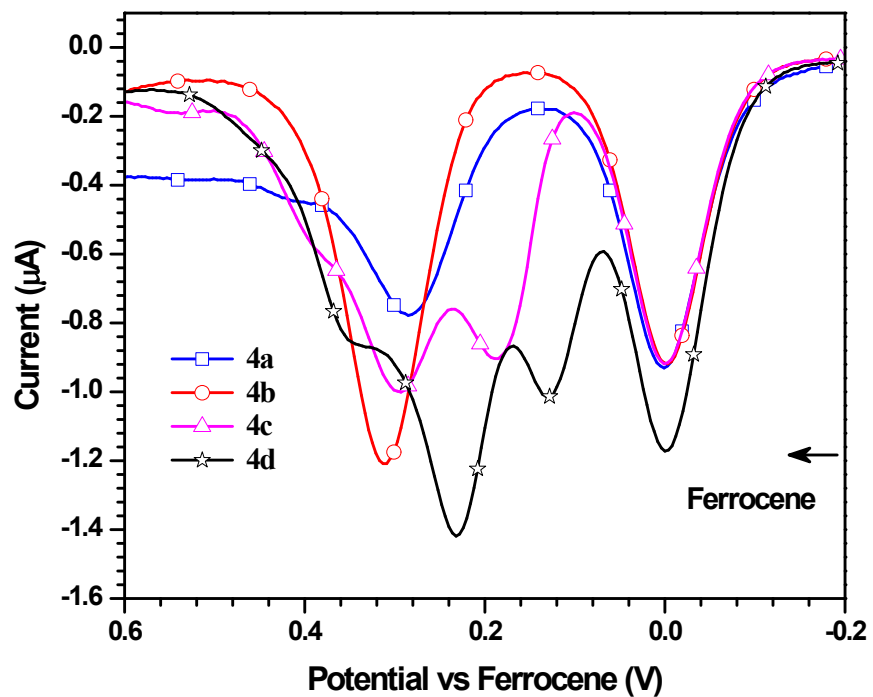

Fig. S10 Differential pulse voltammograms for the dyes (4a-4d) recorded in dichloromethane.

IB-STYRE

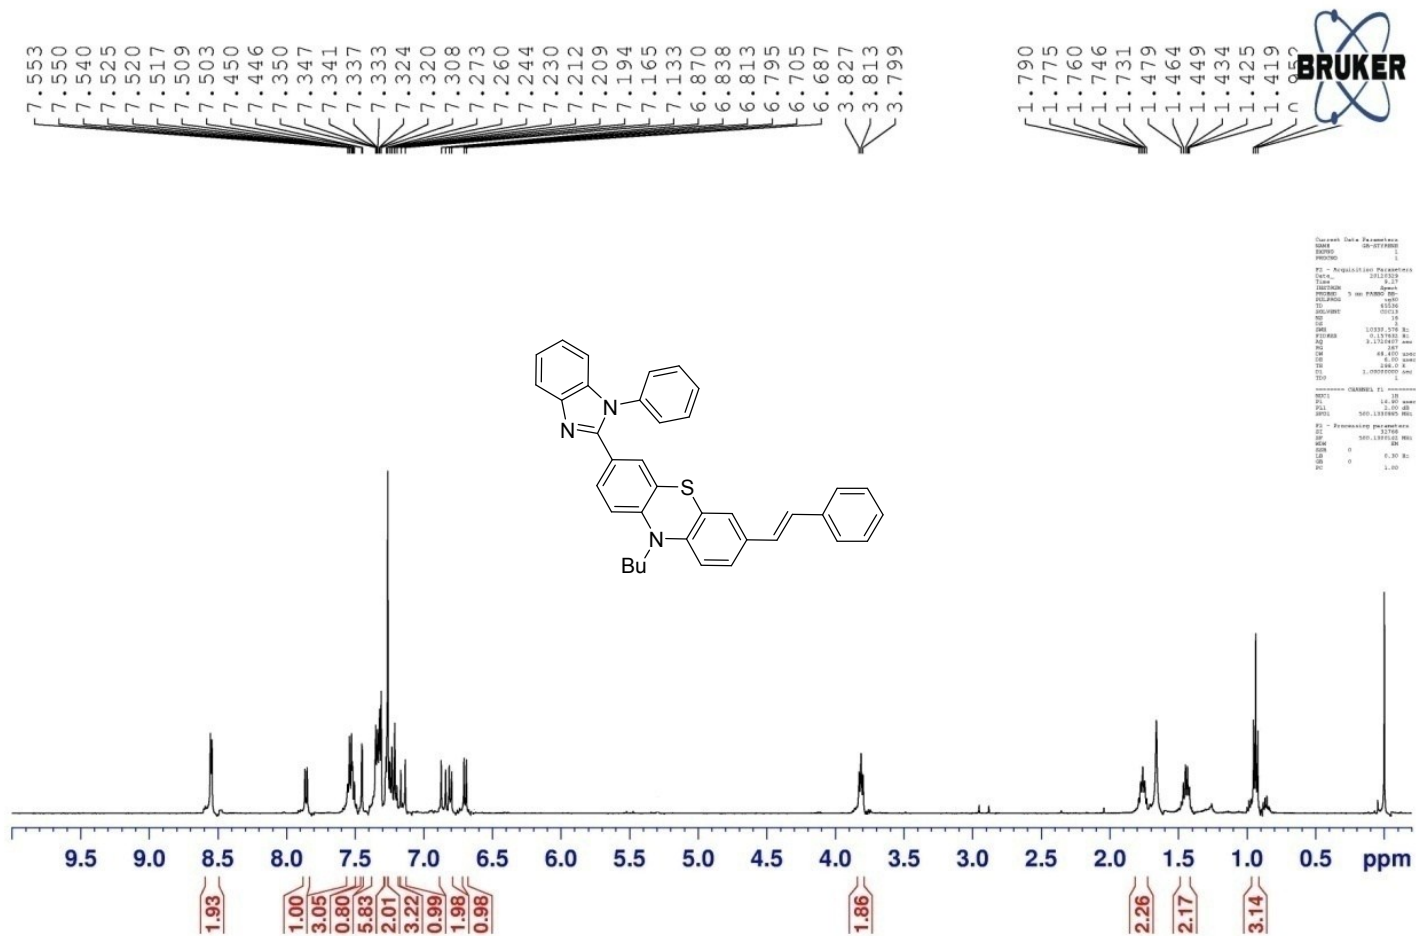

Fig. S11 <sup>1</sup>H NMR spectrum of 4a.



GB-STYRE

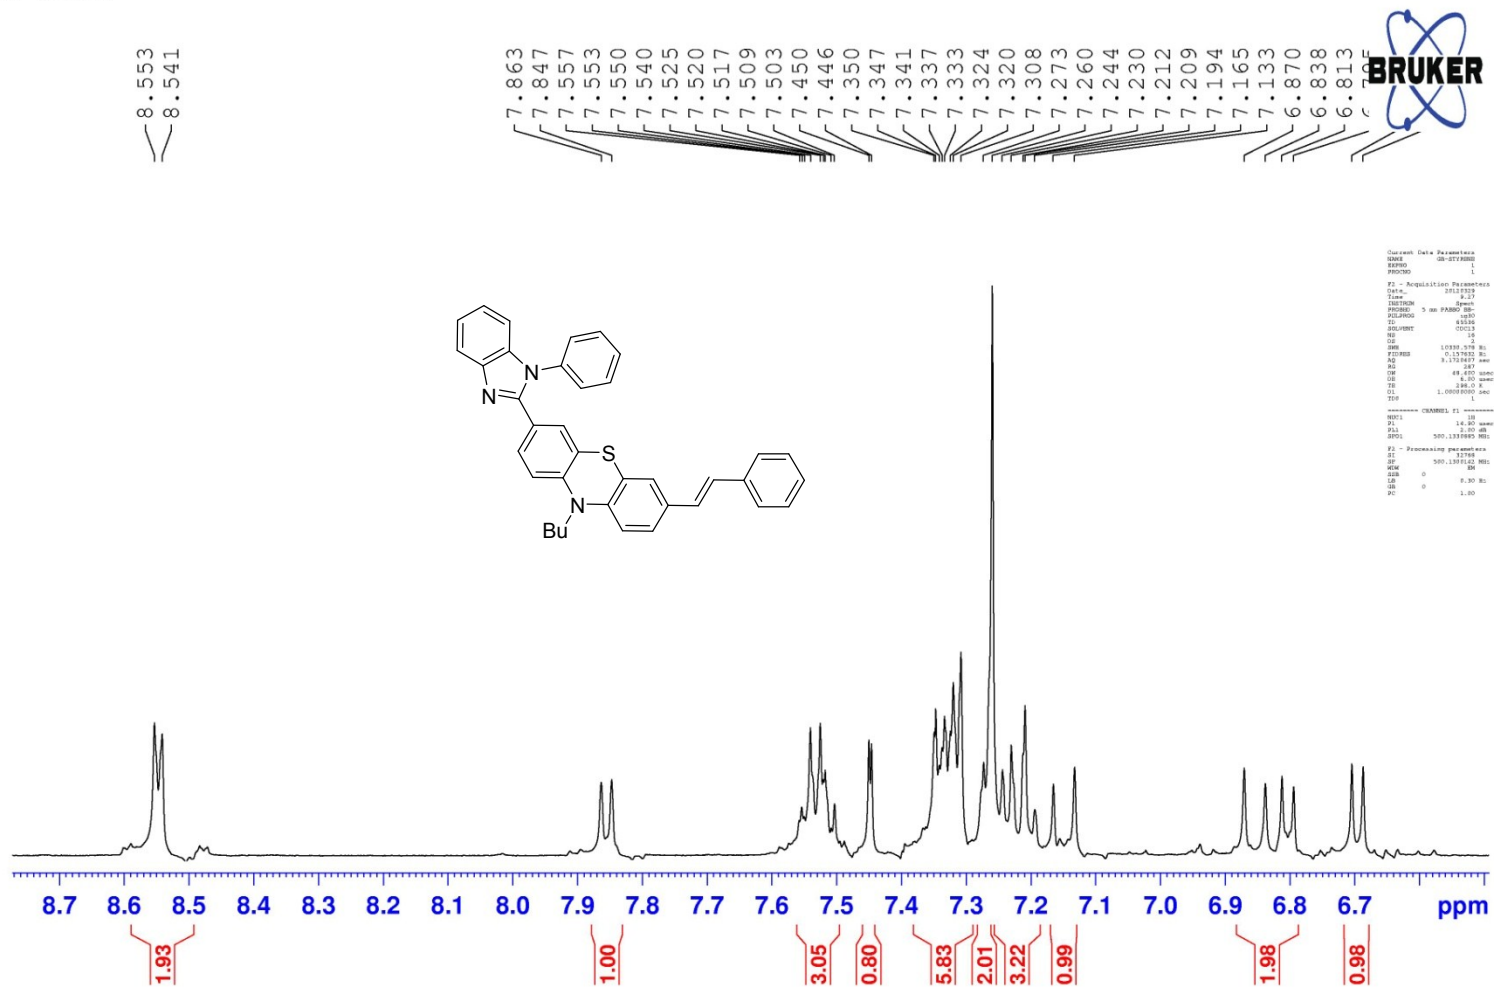

Fig. S12 <sup>1</sup>H NMR (expanded) spectrum of 4a.

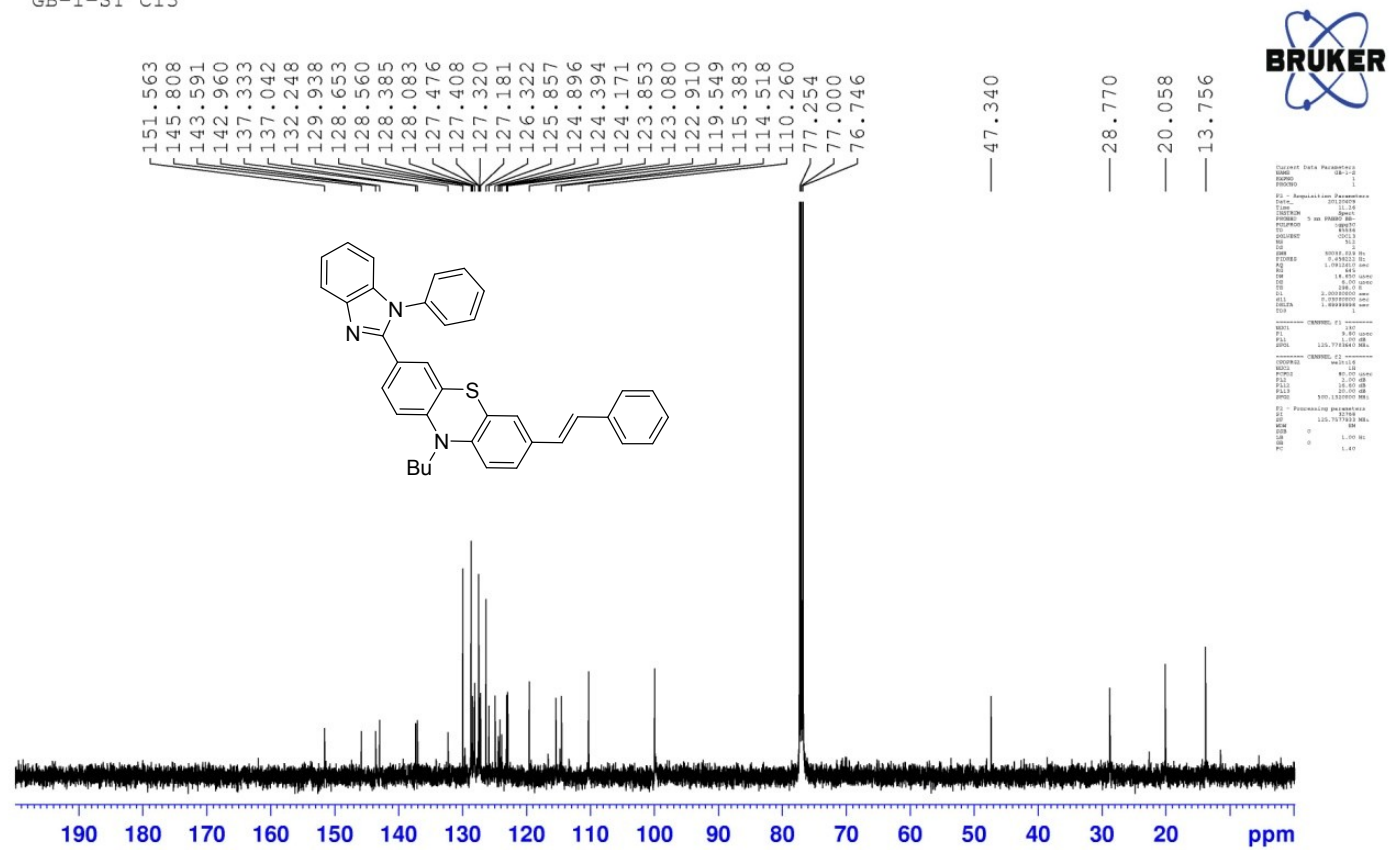Fig. S13 <sup>13</sup>C NMR spectrum of 4a.



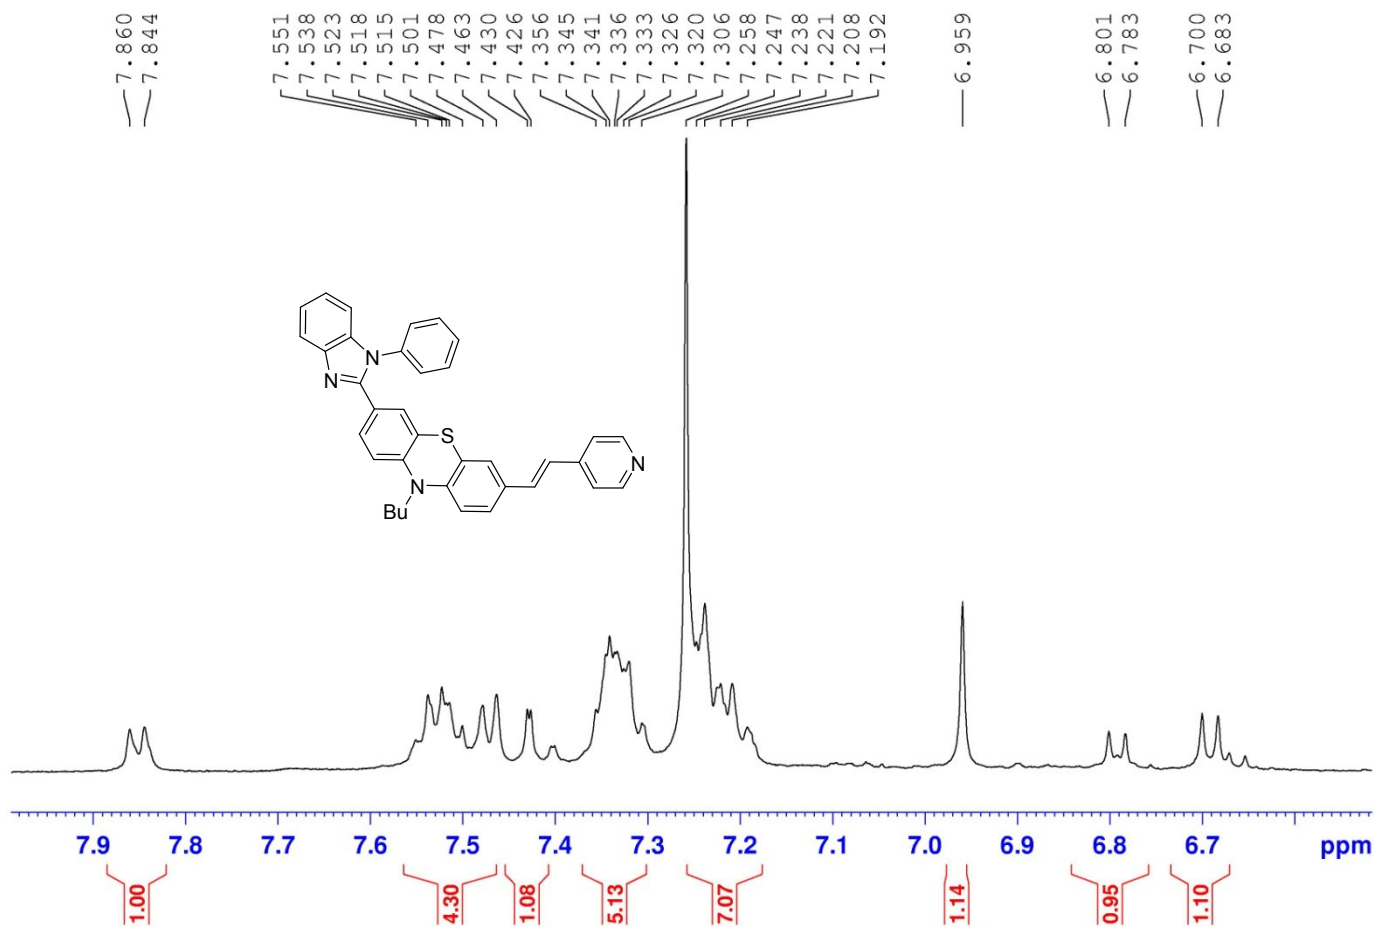

Fig. S15 <sup>1</sup>H NMR (expanded) spectrum of 4b.

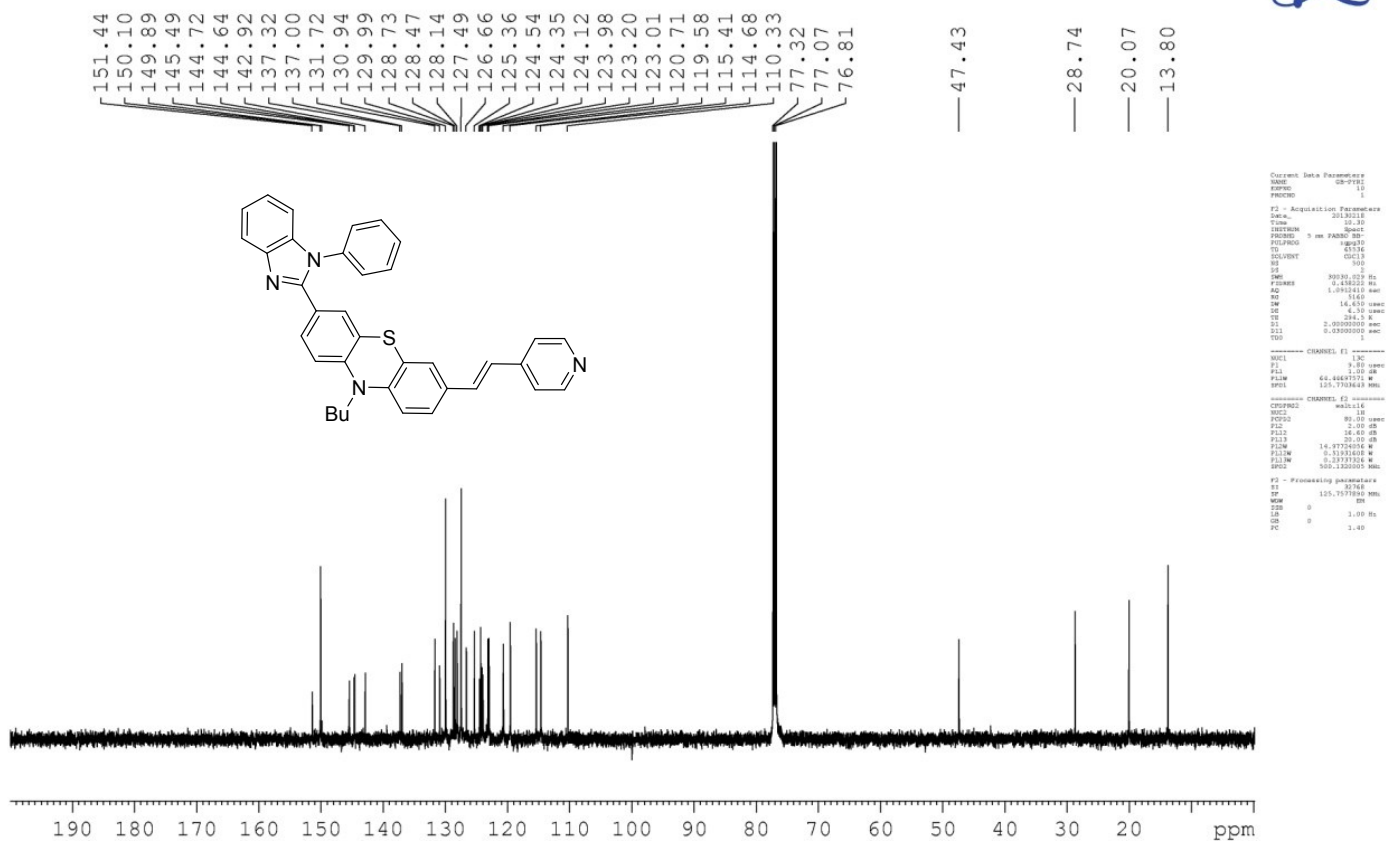Fig. S16 <sup>13</sup>C NMR spectrum of **4b**.

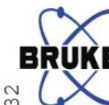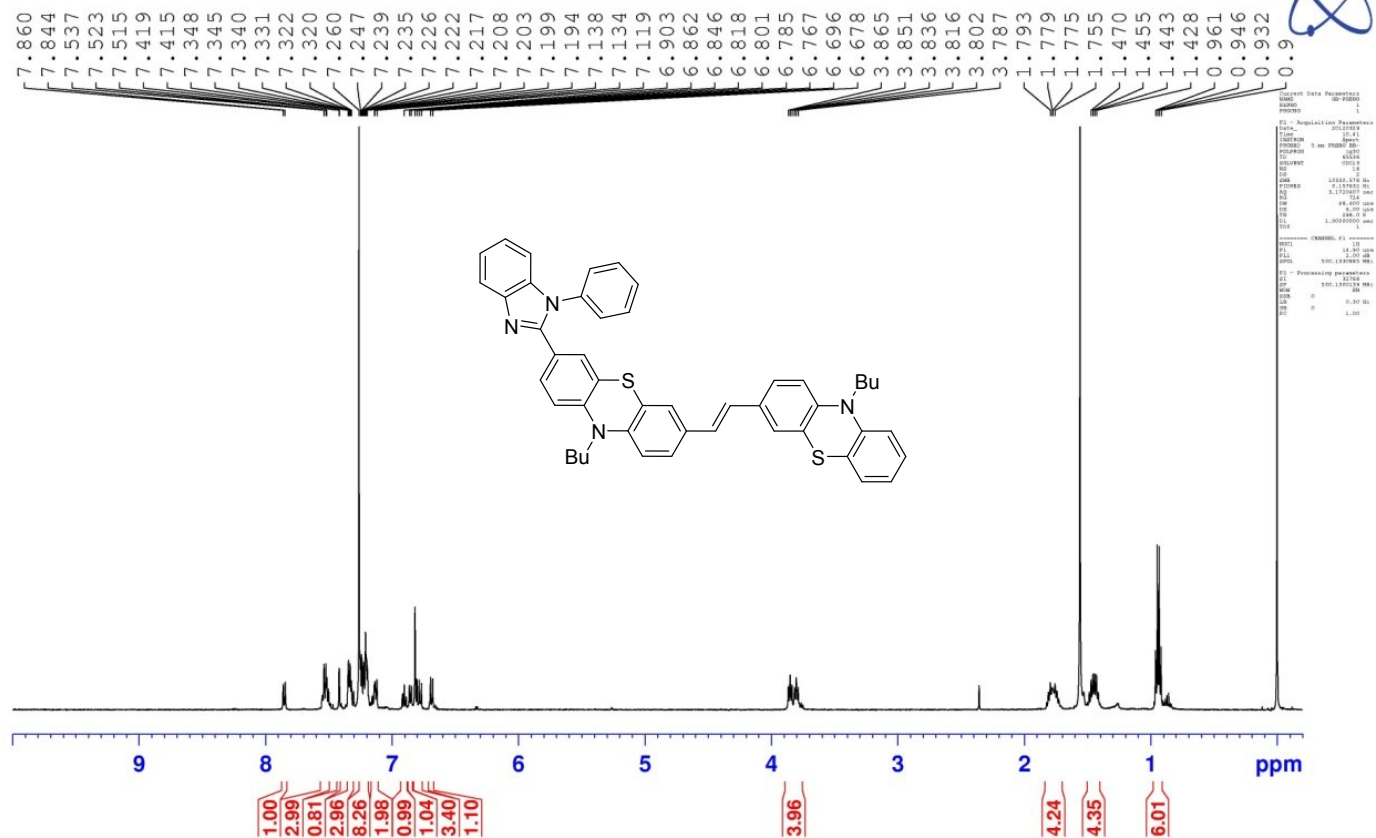Fig. S17 <sup>1</sup>H NMR spectrum of 4c.

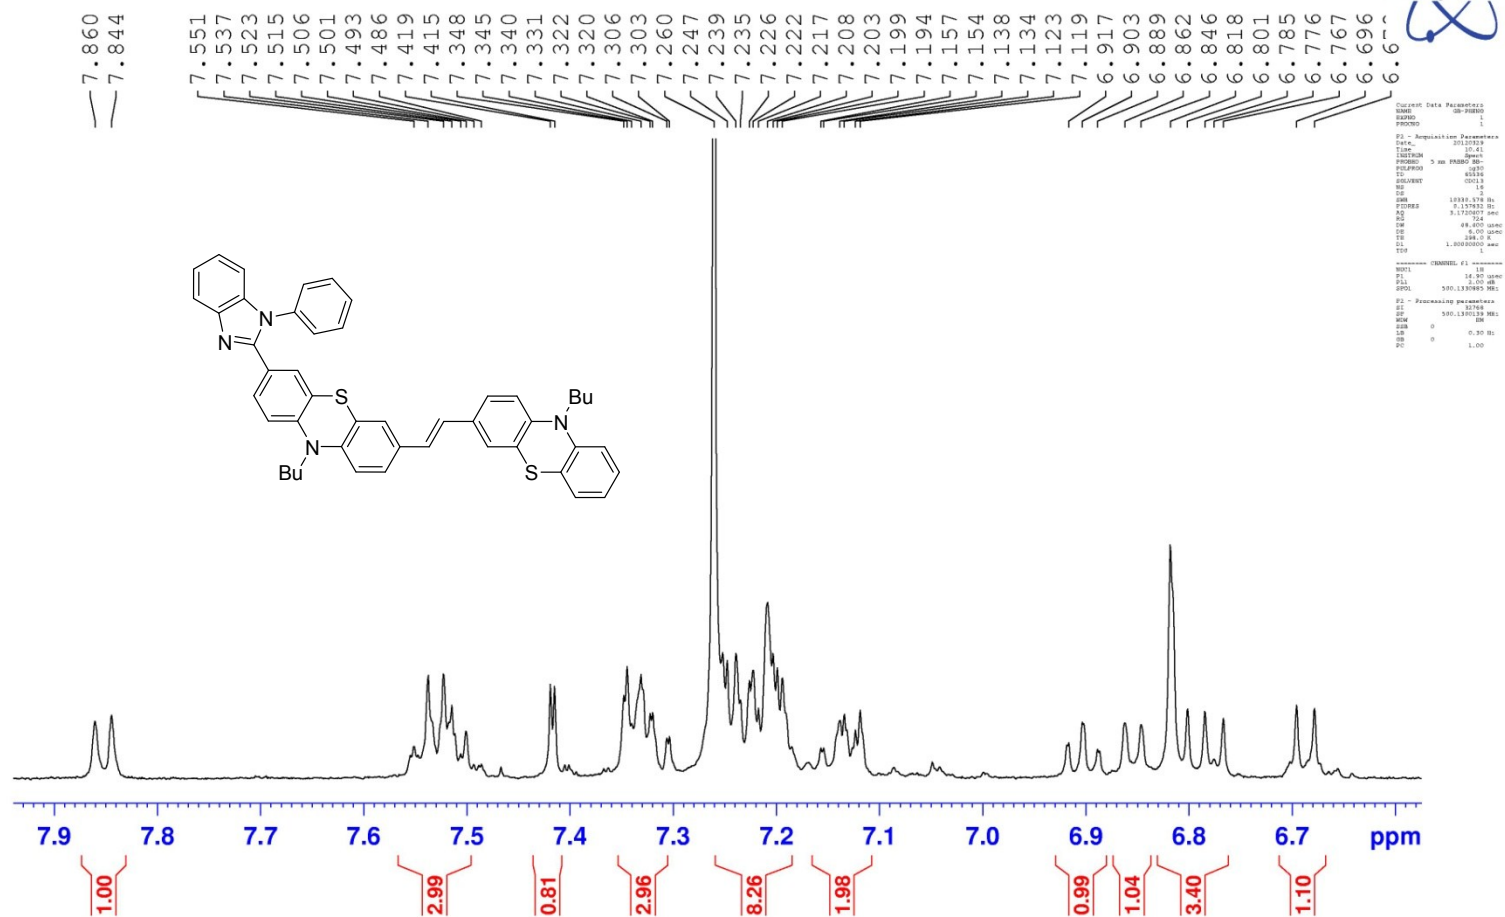

Fig. S18 <sup>1</sup>H NMR (expanded) spectrum of **4c**.

GB-1-20

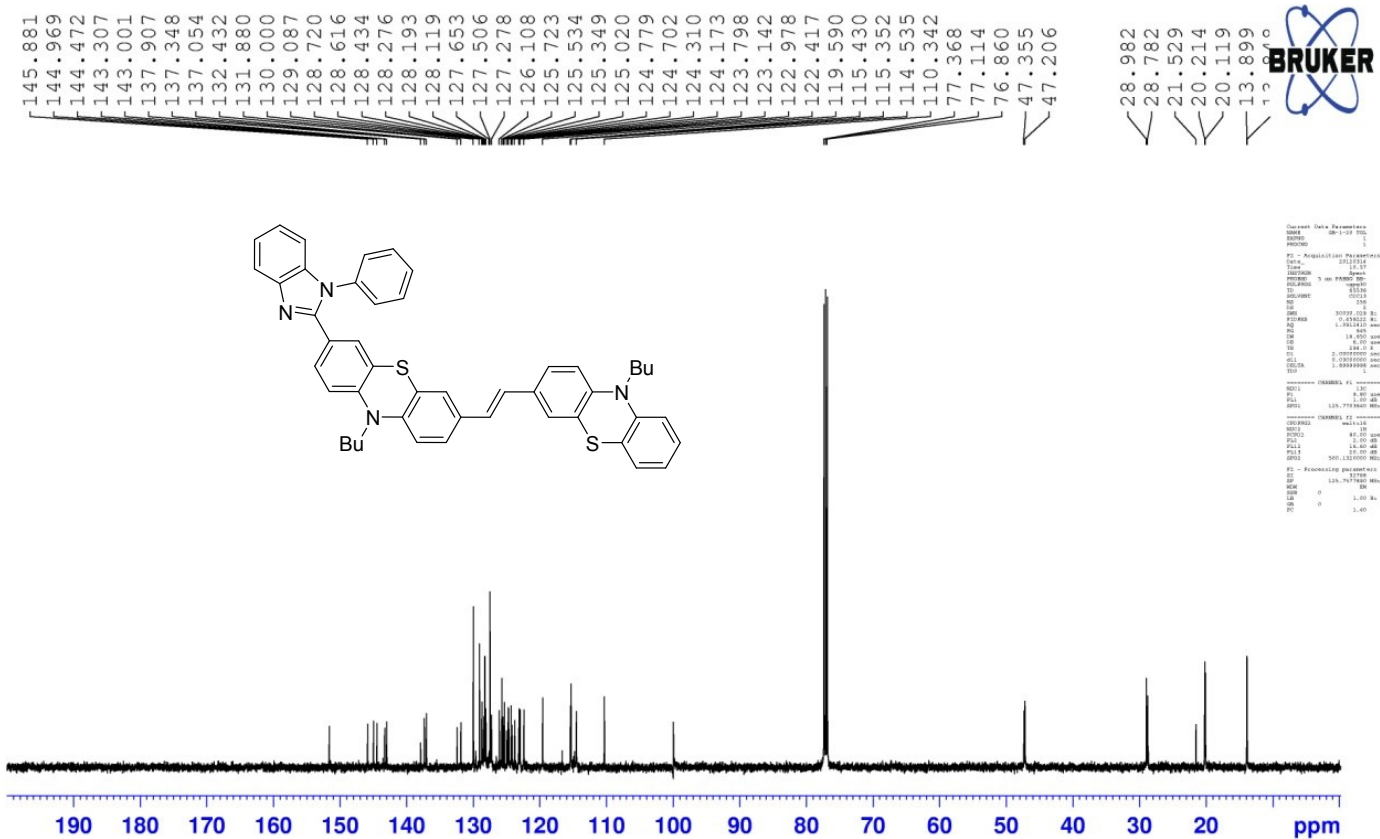

Fig. S19 <sup>13</sup>C NMR spectrum of 4c.





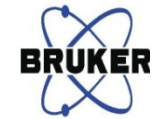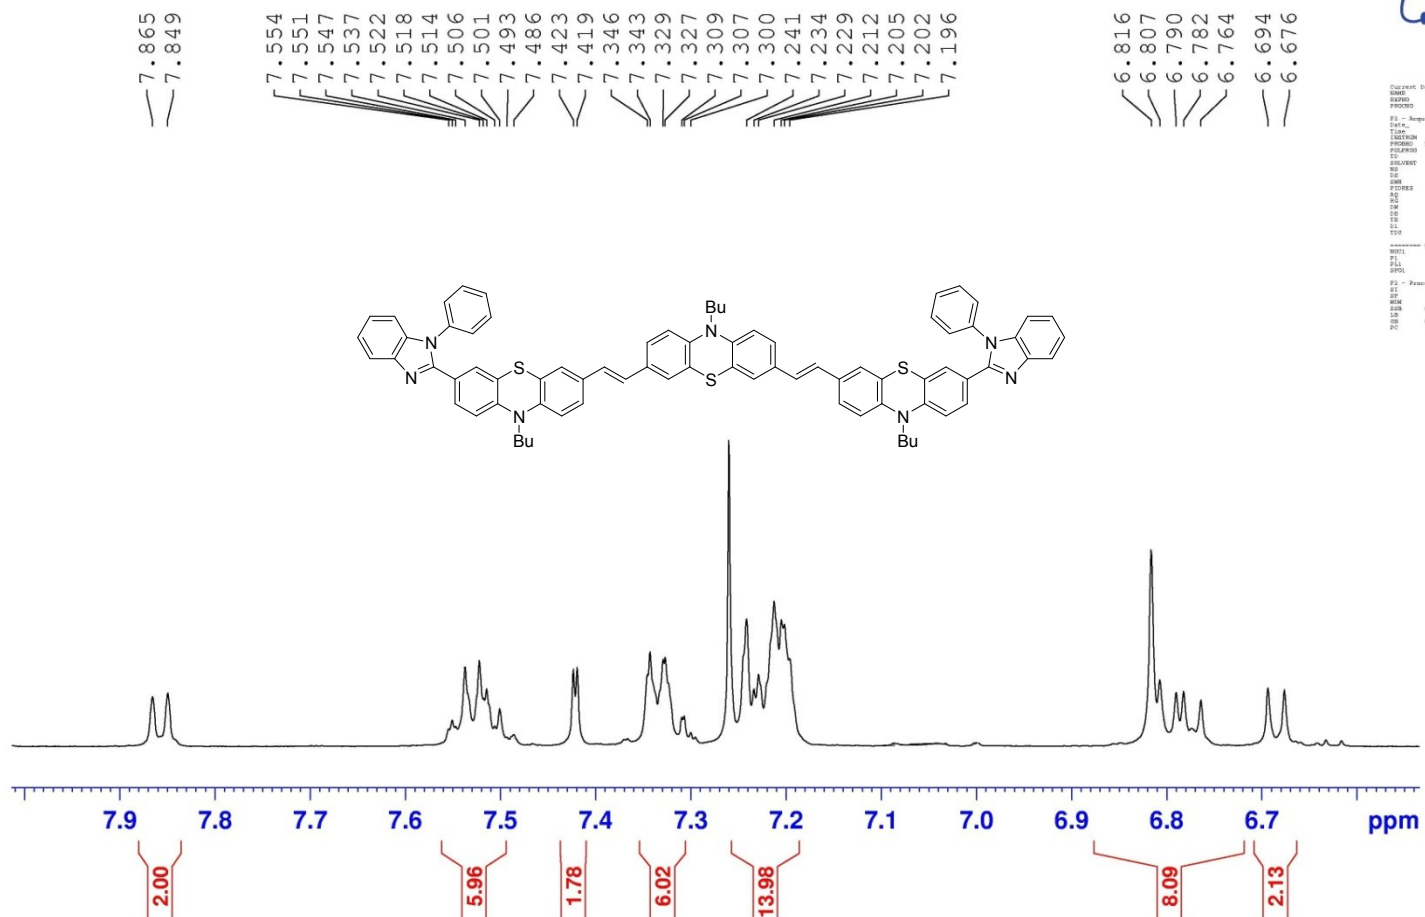

Fig. S21  $^1\text{H}$  NMR (expanded) spectrum of **4d**.

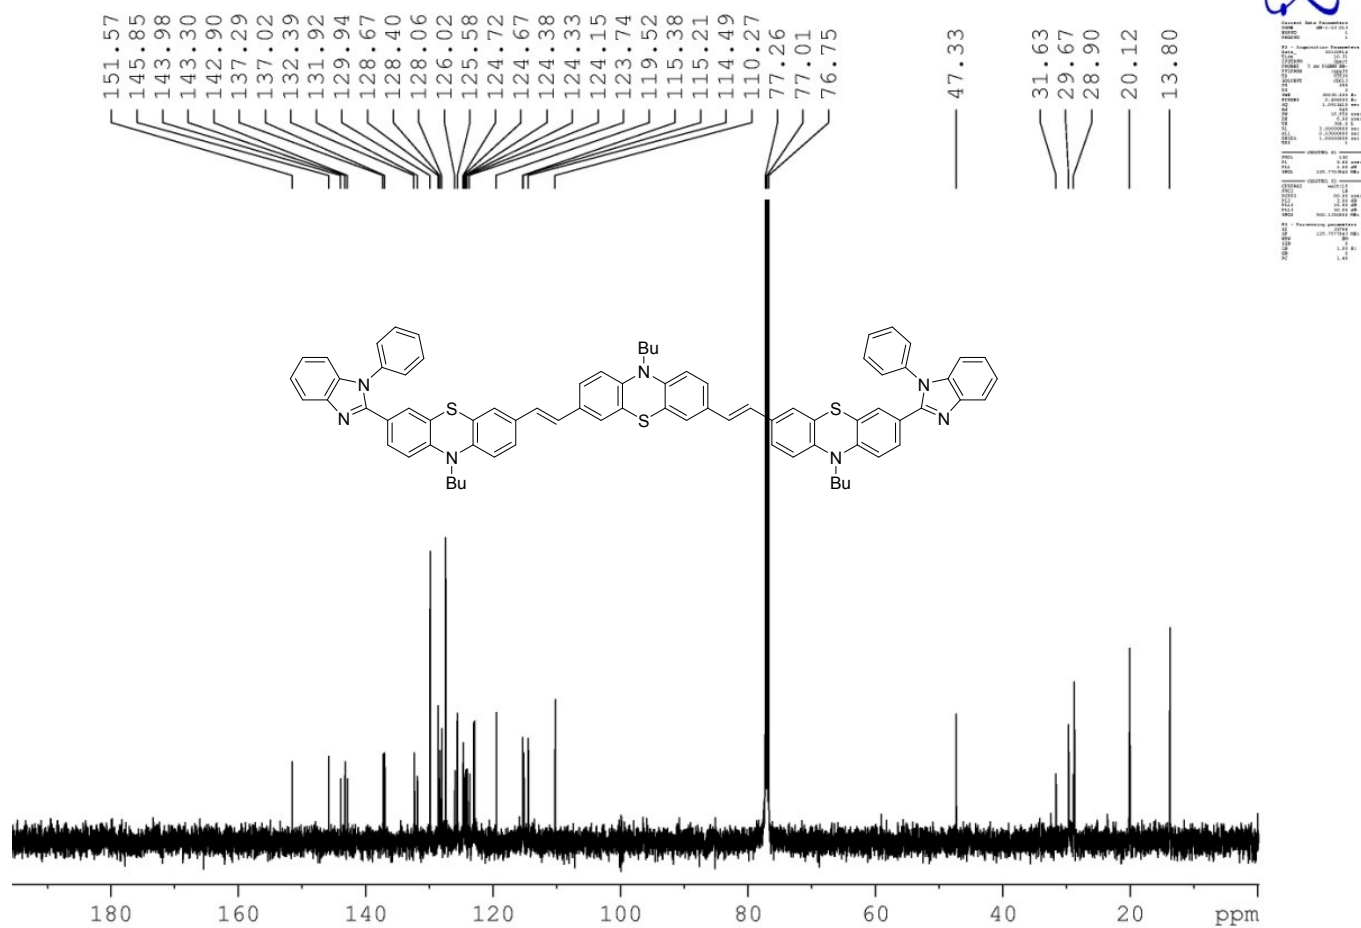

Fig. S22  $^{13}\text{C}$  NMR spectrum of 4d.
